# Supplementary material
Source: Springer Nature journal article supplement (https://www.springermedizin.de/resource/supplementary/12936_2006_296_MOESM4_ESM.pdf/9547118)

**Fold above or below mean**

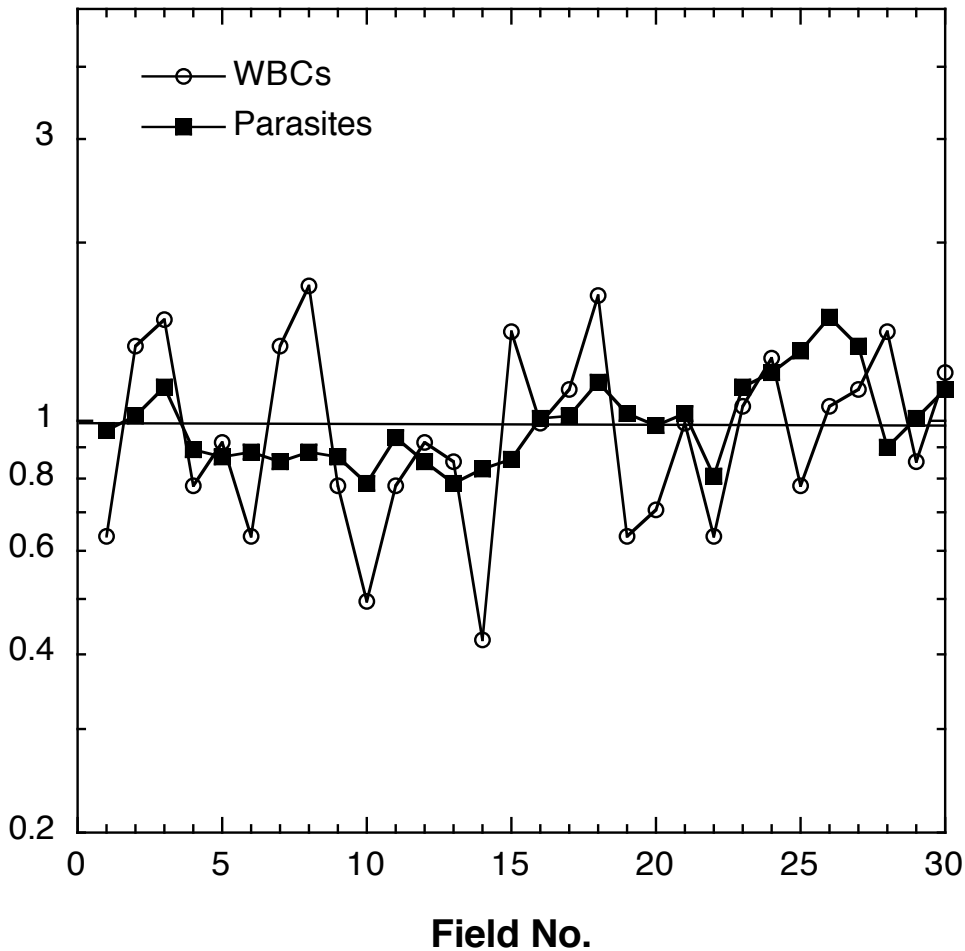

Supplement: MOESM4 [file 9547118]
